# Supplementary material for: lincRNA00907 promotes NASH progression by targeting miRNA-942-5p/TAOK1
Source: Aging (Albany NY). 2024 Apr 10;16(8):6868–82. doi: 10.18632/aging.205730 (PMC11087098; doi:10.18632/aging.205730)
Supplement: Supplementary Table 1 [file aging-16-205730-s001.xlsx]

## Sheet: Supplementary materials 1. miRD
Supplementary Table 1. miRDB database was used to predict target genes of miR-942-5p.
DCT
PHF21A
SLC4A10
CHCHD3
LRP8
SGMS1
CREBBP
RREB1
KNG1
YAF2
DIAPH2
LPP
RANBP3L
THRB
HSPD1
RND3
CCBE1
WASF3
RAD1
TRIM66
C22orf46
ZNF704
GALNT15
BCO1
RBM20
MAT2A
GALNT2
ZMYND8
TAF12
CREBRF
RPL7L1
ZBTB18
C1orf56
PLPPR1
NOTCH2
PROSER1
CHEK1
DDX6
NAB1
UBALD1
ATXN7
KIF3B
AFG1L
MTFR1L
SUPT16H
SPATA17
EXOC6
TBL1XR1
BHLHE40
SH3TC2
ZNRF1
NRXN1
ESYT1
CACNB4
ZFAND1
PLAUR
B4GALT6
CLVS2
ADGRF5
VGLL3
ESR1
PIGP
DAG1
ZNF559-ZNF177
MDM4
TMEM178B
ARPC5L
CNOT7
TNIK
RAD54B
PHACTR3
KLF3
CFAP97
PIAS1
CHUK
FUT8
B3GALNT1
MRPL33
USP27X
GPC6
DEPDC4
SMKR1
GNAL
GABPB1
MIS12
USP49
TMEM132B
TAT
KIAA1549L
BMPR1A
P2RY12
LSAMP
CCL14
MTMR1
EHD4
PSMD1
KLF7
PQLC2L
GUCA1C
KDM5A
ARSB
SMIM8
PLEKHM3
TNS1
PACRG
CNTD1
SC5D
SMPDL3B
FXR1
SURF6
PAK2
PPM1F
UBIAD1
C16orf70
MECP2
PIF1
MAPRE2
SYN1
PCDHB12
STIMATE
AGAP1
TGFA
CACNA1E
GOLGB1
TRAK1
CALHM1
TDRD6
C12orf49
EDA2R
GDNF
DDX4
NETO1
CHCHD7
CD83
LEP
COX11
ZNF518A
DMAC1
XKR5
GINS4
ERC1
C8A
SLC30A6
TPH1
ALG11
HEPACAM
TCERG1
SENP7
CUL4B
PRKG1
NCKAP5
ANKRD34B
EMP2
API5
ZNF618
CDKN1B
SLC49A4
RALBP1
DCAF4L2
LAMC1
NAA50
ZNF302
SELENON
AVL9
LMNA
NOVA1
PFKFB2
PLTP
RHOBTB3
SLC7A1
ZNF135
SLC4A8
C10orf126
RAB3B
SNX10
NECAB1
GPR85
KCNB1
RBM15
PRH1-TAS2R14
ZNF75D
HPRT1
WWP2
GPATCH2
CCDC32
PKP2
HOXA10
WDHD1
GJC1
OR11A1
ZNF552
CIPC
ZNF620
CDC37L1
PASK
EEA1
ZNF276
XRN1
MEX3A
DCDC1
SLC17A2
PLXNA4
TAOK1
SGPL1
LRRC15
BEST4
CHST2
CYP2U1
OPCML
DGKK
RASAL2
OTC
CSMD2
SPTLC2
ZFP1
COA5
CKAP2
C2CD2
NEDD9
PLCL1
UMPS
CCDC50
DUSP16
CREG1
HACD4
PDK1
EPHA7
GFPT1
COL6A6
IMPG2
SLC35G3
DIS3
NCAM1
STXBP1
GTF2A1
PDK4
HMBS
PICALM
NEDD1
NLRP2B
IL6R
NFASC
RASA4
VWA5A
SPDYA
CDS2
DIAPH1
ROBO4
AHCYL1
ALG9
PKNOX1
CEBPZOS
DNAJC27
2024-03-01
MAP3K9
ZSCAN22
GPATCH2L
C6orf89
CLDN12
HS3ST5
AGO2
GXYLT1
SREK1
COL4A5
KATNAL1
ZNF426
FGFR2
ZNF287
CCDC155
METTL15
ZFP90
DISC1
KLHL15
TFDP2
TCP11L2
PARPBP
ZCCHC3
ZNF710
THAP2
ZFYVE16
TANGO6
ACSM2B
LOC101929372
GLIPR1
SAMD13
FBXW11
SMU1
TLR6
SPIN4
LRRC10B
GUCY1A2
ATAT1
TM9SF3
TMEM199
PDIK1L
PCDH17
HLA-DRA
ZDHHC23
CAVIN4
PRELID2
ONECUT2
CCND1
HTR4
EDARADD
MOB1B
LARP1
DCAF4L1
KIAA1958
HDX
ADCYAP1
SHANK2
RAB11A
DBT
PHACTR2
DRD5
MAGEB4
OGN
RB1CC1
MTFMT
BICC1
ZNHIT6
RUNX1
SRSF10
STARD8
WDFY1
TMEM43
BACE1
STAU2
FCRL4
PDE1C
OR51E1
CACNG8
ZNF559
AAK1
ZNF462
PECAM1
NFIX
APBA1
NTM
OAS3
AVPR1A
BACE2
LRRC66
HS3ST3A1
MTUS2
RASSF6
CHD7
ATP13A4
KDELC2
NUDT11
ZBTB39
MED7
WBP1L
SHISA7
ZEB2
HIRIP3
SRGAP2
LONRF1
KLF8
ARRB1
IGFBP4
GP1BA
CHRDL1
GPR176
EIF4E2
INHBA
FCMR
LIN28B
CD160
SEMA5A
2024-09-10
CFAP300
FAXC
CTSC
FBXO31
ENTPD4
CCDC82
MANEAL
MSRB3
KBTBD8
KCNC1
GATA6
STEAP3
TSPAN5
USH2A
SDK1
GID8
COP1
SPAST
EML5
POU2F2
DCAF4
TM7SF2
ABLIM1
F2RL3
CBX1
FAM219A
ILDR2
CBSL
RNASE11
LIN52
ANKRD6
AGAP3
PDLIM2
PRR14L
TMEM74
ETS1
TEX13B
CPEB2
KCNJ3
SETD7
AMDHD1
LACC1
TEK
CAMSAP3
KHNYN
POGLUT1
SLC1A1
SCAI
XYLT1
WAPL
ASPH
ZNF652
ERP44
NQO2
UBE3D
PPP1R1C
NHEJ1
ZNF250
SERPINE1
PCDH9
KDM7A
ZNF440
RNF217
TRMT9B
KDM5B
MARVELD1
MDN1
C1orf115
CTDSPL2
PLA2G4F
ZNF106
FAM120C
KLHL21
CBLN3
ATP8A1
NUDT15
WDR20
NIPAL2
SMIM11A
MEF2B
RAPH1
NAIF1
ANOS1
EVC
TPST2
ENPP1
DPP4
CD36
SRP19
UBE2L3
YAE1
GCN1
TMPRSS11D
IL24
IPO11
SLC6A11
USP2
ARL17A
TTC9
ANKRD50
KCTD21
SNX1
ZNF445
TSTD3
CAMK4
GRID1
FAHD1
MAX
VHL
SDC4
ENDOU
HECW1
TLL2
DDX21
ZNF90
ZNF268
C10orf62
CASP7
RBAK
SPATA13
CBR1
AKAP6
EIF4E3
PEG10
BTN2A1
CAMKK2
GNAI3
GTF3C3
CCL25
ABHD13
LRRC27
KRT4
ZKSCAN2
CNGB1
ZNF117
EPDR1
ASCL1
E4F1
NR2E1
NKIRAS2
SRGAP2B
ARPC3
EPHB2
SLC24A2
STOML3
COL11A2
HAGH
FOXJ2
UNC80
DCAF5
RNF157
SECISBP2L
IQCE
PLEKHB2
RDH10
TRDN
PPP1R1A
C1QTNF1
PAX4
PAPPA
ACVR1C
NMNAT2
MCFD2
TTLL4
BCAR3
CLEC6A
PATZ1
PPP2R2C
ANO5
ITPRID1
SLC36A4
EPB41L5
UBE2W
PUS7
GPR26
MAPK1IP1L
IFI44
SUDS3
KANK4
PTPN2
HK3
GPR158
SLIT3
RDH11
ITGB6
TMEM19
ARSD
LPGAT1
KAZN
TLN2
SLC5A5
TRAF3
PRTG
EGLN3
BAGE2
NXT2
LRRC20
ZNF605
C18orf25
THBD
AMACR
GLIS3
IL7R
WHAMM
MAPK10
NUDT21
SH3BP5
CSGALNACT2
ZMAT3
SMIM11B
SLC25A27
SRP72
SATL1
LINGO4
THSD7A
TSHZ2
EIF2AK2
OTOGL
ZNF544
SQSTM1
ST8SIA1
TRIM36
ANKRD44
ZBED8
MTRNR2L9
BOLA1
COX20
ZNF780B
MAP3K2
INSYN2
ZNF75A
TFCP2L1
PAX7
AFTPH
NPR3
RNF43
TOM1L2
ZNF217
SSR2
DNAJC21
RNFT2
DCAF1
PPP1R10
ASH1L
ATP23
CBS
CPLX1
ZNF32
METAP1
SMO
PRLR
ANK2
PLXDC2
POTEM
KANSL1L
BAMBI
SYNPO2
HNRNPA0
MTRNR2L1
ELP1
TMEM63C
ERRFI1
COMMD2
CCL16
ZNF721
UNC5D
DCAF8L1
AES
ALX4
ADORA2B
ZDHHC14
CMKLR1
SAMD12
TOR1B
KIRREL1
PGAP1
DCX
PYGO2
KIAA1549
L2HGDH
BRWD1
TEC
PIK3CD
CCER1
TCEANC2
STUM
SLC17A7
PRKACB
MAPK8IP3
SLC8A3
ZBTB8OS
MTR
ZNF195
CLDN19
HAUS2
TRPC5OS
PDXDC1
STOX2
PDPN
NCOA2
DEFB134
AKR1B1
NBPF15
SNX29
CLHC1
ADCY7
IGFBP5
RBSN
EIF4E
SLC39A6
SDC3
ARHGAP28
NRN1
OTX2
ZNF536
RAB31
H2AFY2
RSPO3
ZNF501
TBC1D7-LOC100130357
NPNT
FAM71F1
TSPAN3
TSLP
LGSN
ZBTB7C
OSBP
UQCRB
PARP8
LRRC57
ZMYM2
MRPL48
HMGCR
NPAS2
SLC11A1
PLCB1
CSRNP3
PI15
TAB2
SHLD2
MRPL11
A2ML1
RPS6KA5
GRTP1
GUCA1A
DIABLO
FAM84B
ERG
STXBP5L
CAPZB
FAM170A
STIM2
CLLU1OS
IMPA1
FKBP5
USP14
ANO4
DGKI
SWI5
ENOSF1
ASB1
ING3
CLOCK
THG1L
DUSP10
ENPP5
GREM1
ZNF266
PDE10A
TGDS
AMOTL1
MBD1
HPCAL4
C8orf33
MED21
WDR35
BID
STAM
TRMT5
CACNA1C
VGLL2
ZDHHC21
UGT3A1
CRY2
ZNF677
TNXB
GNPTG
DNAJA1
A1CF
PRKAB2
MEOX1
YME1L1
GVQW3
SH3PXD2A
CAPS2
TNRC6B
ZNF678
PPHLN1
SH3RF1
MRAS
SLCO1A2
SLC16A12
ARMC9
TMEM92
TSPYL1
AKR1C3
NEUROD1
CSTF2T
PRRG4
SLC6A6
PALM
SMARCA4
UTP18
APLN
ZNF589
TRIM38
STRAP
LDLR
ERBB4
RBFOX2
GPX8
DGKH
TTC37
RABEP1
ISCU
ZSCAN16
LRRN3
LSM8
FAM43B
ACADL
NWD2
SSR1
MOSMO
NIPA1
ORAI2
DPF3
HIVEP2
KCNA4
CEACAM16
KCNJ10
RIC3
ITGB5
AR
CD44
CLVS1
ZNF37A
SRGAP1
MYB
EIF3M
DLG3
SPOCK2
CBR4
HSBP1
C6orf62
BROX
FASTKD1
NSL1
ZNF366
MAF
CLCN3
RBM19
SEC24B
ODF2L
HTR5A
CSNK1G1
OTUD1
FSBP
RRP36
VLDLR
SPICE1
SORL1
FNDC7
ARFGEF2
GTF2A2
PIK3R1
SYT7
C9orf153
C1RL
TLL1
FBRS
RAD54L2
FLNC
RIDA
AMER1
COG7
KLRC4-KLRK1
CLASP2
UQCR10
C3AR1
KLRK1
TRAF4
ZNF181
PDLIM5
EXOG
VASH1
CDV3
PDE7B
SLC25A36
BTBD3
MYOZ2
PIP5K1A
DDX28
PLEKHA8
HBEGF
ABHD5
SOGA3
MDGA2
TMEM242
PPP1R12A
COPS2
HOXC13
IFI27
TTC4
KPNA1
ATRN
SLC9A7
ZNF20
DEK
GFRA1
MBOAT1
LRRC18
ZSCAN23
SNX11
MS4A6A
AAMDC
NANOS2
EFNB3
TPPP
SYS1
CCNH
DEFB132
NME9
KIAA0513
ZNF471
FAM122B
HOXA3
ZNF322
MTRNR2L6
OPRM1
GPBP1L1
PRDX3
CHTOP
ALKBH4
JAKMIP2
FCGR1B
SLC22A18AS
TRAT1
PTBP3
SMARCA2
C3orf79
DLGAP1
ZC3H12B
MAGEL2
LMOD1
PLXDC1
ORMDL3
HECTD1
TNRC18
ENDOD1
AK3
PKP1
SLC22A13
CCDC107
