# Supplementary material for: lincRNA00907 promotes NASH progression by targeting miRNA-942-5p/TAOK1
Source: Aging (Albany NY). 2024 Apr 10;16(8):6868–82. doi: 10.18632/aging.205730 (PMC11087098; doi:10.18632/aging.205730)
Supplement: Supplementary Table 2 [file aging-16-205730-s002.xlsx]

## Sheet: Supplementary materials 2. TARB
Supplementary Table 2. TarBASE database was used to predict target genes of miR-942-5p.
ZNF536
CREBBP
HPRT1
EPHA7
NOTCH2
TCERG1
KDM5A
ETF1
HSPD1
ZDHHC9
HNRNPU
C14orf177
DLC1
ZDHHC5
RBAK
MAP1B
LUC7L3
TBL1XR1
PPP1R10
TYW3
ARID5B
SSR1
LIN28B
LPGAT1
TMEM178B
LARP1
ELAVL1
NAB1
PURB
MAP3K2
TAOK1
LAMC1
PAK2
HMGCR
CCND2
HP1BP3
APEX2
PPP6R1
MTHFD1L
ANKRD6
DYNC1H1
PKP2
ARNT
TSPAN3
PLOD2
C6orf62
RBM27
CDK6
OTUD4
NKD1
CAND1
EPRS
RBBP7
CEP55
GTF2A1
MYO6
KLHL3
GJC1
AGPS
ZBTB20
MESDC2
EIF2AK2
SOX11
HRK
ELK4
EIF4E
CD48
TAF4
STK40
UQCRB
NUFIP2
MAPK14
PDCD11
CENPF
CLOCK
SESTD1
PDS5A
UGCG
SETD1A
ZNF583
ITGB5
USP24
ROBO1
CLNS1A
PEG10
TNRC18
SMYD4
AKAP11
ZBTB11
IGF2BP1
MRPL11
HNRNPA2B1
STK38
JARID2
CENPE
ZNF212
ATP6V1B2
ANKRD52
CCNT1
EIF3A
CBR4
SESN3
CKAP5
SOX4
KMT2A
AGFG1
ATP6V1A
SV2A
ZFP41
CACUL1
AFF4
MED7
ZKSCAN1
CEP104
TMEM192
ZZEF1
TET3
IFNAR2
ZCCHC14
2024-03-07
EDC3
EPB41L2
MLLT4
FBXL3
TRIM33
RC3H2
TOP2A
EIF2S1
LTV1
HMGCS1
POLE3
GFPT2
TERF2IP
C9orf41
EGFR
C7orf25
SPTSSA
NAA50
THBS1
FSTL1
STAG2
PHACTR4
DUSP1
ILF3
HELLS
MTHFD2
TMEM167B
2024-03-06
ENOPH1
CCDC117
ATXN1L
TULP4
TOR1AIP2
POU6F1
LAD1
PUM1
PRPF38B
NUF2
ZSCAN12
MDGA1
SPEN
CDKN1B
GINS2
