# Supplementary material for: lincRNA00907 promotes NASH progression by targeting miRNA-942-5p/TAOK1
Source: Aging (Albany NY). 2024 Apr 10;16(8):6868–82. doi: 10.18632/aging.205730 (PMC11087098; doi:10.18632/aging.205730)
Supplement: Supplementary Table 3 [file aging-16-205730-s003.xlsx]

## Sheet: Supplementary materials 3. TARG
Supplementary Table 3. TargetSCA database was used to predict target genes of miR-942-5p.
C22orf46
ZNF23
ZNF655
SH3PXD2A
STXBP1
PPP1R1C
CIR1
DIAPH2
ZNF667
CLLU1OS
DST
RP11-467N20.5
C10orf126
SMKR1
MCFD2
PCBD2
MRPL33
CCBE1
SLCO1A2
ZNF286B
KDM5A
PCDHB1
NDUFAF2
CAPS2
FGF1
RP11-944L7.5
DCT
METTL15
CCL16
ZNF471
HELLS
2024-03-01
SLC35G3
ATP6AP1L
AC007390.5
ZNF605
NQO2
ZNF117
CCKAR
RND3
GPR139
PFKFB2
ZNF268
KNG1
RP11-849H4.2
CYP3A5
GRIN2B
GREM1
TGIF2LY
EVC
PCMTD2
SRSF4
ZNF616
TSLP
RAD54B
IL1RAPL1
HPRT1
PIWIL2
LPP
FCRL4
CDKL3
DEPDC4
KIAA1430
TCERG1
HSBP1
CHCHD7
GXYLT1
ZNF544
UBALD1
FAM221B
ZNF302
PRLR
BOLA1
C5orf27
CALHM1
RAB27B
LYRM5
AMOTL1
KLRK1
LGSN
ZNF721
XRCC6BP1
GUCA1C
IMPG2
CCL14
XKR4
CTD-2140B24.4
ZNF300
TAOK1
SLFN13
TMPRSS11B
CHUK
SKA2
MRPL48
RP11-144F15.1
IFI27
PSMD1
STOML3
SCAF11
IPO11
SPDYA
HRSP12
SGMS1
C11orf48
ZNF528
OTC
GOLGA6L6
TNIK
FLJ20373
ASCL1
PPCS
TAF12
WDFY1
PHF15
TPST2
TDRD12
PYURF
ZNF525
RP11-116D17.1
CHP2
MTFMT
NT5DC4
WFDC12
GOLGB1
LRRC27
SLC25A26
OPCML
LACC1
POU5F2
ZNF225
CREG1
GPR26
LPPR1
ZNF233
MTFR1L
FAHD1
CLEC6A
CCDC62
KIAA2022
SMIM8
UTP11L
NKX6-1
PACRG
RBBP7
RABEP1
C14orf177
GOLGA6L1
MAT2B
RREB1
AC008394.1
SENP6
JAKMIP2
RNASE11
CHRDL1
MRFAP1L1
CCL25
CYP2A7
DCAF4L2
CYP2A6
PRICKLE2
PLTP
CDC42BPA
TMEM261
BOC
EGR3
PAK2
FAM169A
MED19
ZFAND1
MRPS33
ZNF286A
MTR
C10orf62
CDC37L1
GDNF
AFP
POU2F2
SENP7
DNAJC27
KANK4
PTPN11
TMEM232
NUDT13
FAM110C
ARPC3
SATL1
ZNF559
HPCAL4
NOTO
TMEM199
ZMYND8
BCAT1
CCDC140
C10orf91
SETD7
TMED8
HAGH
KCNB1
BAMBI
ISCU
C1orf115
HIBADH
SNX10
HOXC13
C12orf49
IKBKAP
CBLN3
KPNA5
AC112715.2
USP27X
CHEK1
FAM71F1
KIAA1737
TEX13B
PRR15
CD300E
CMC2
ZNF618
BID
PCYOX1L
KRTAP21-2
SYNPO2L
TNFSF10
EPDR1
DDX6
AL355390.1
WNT2B
KIAA2018
AC008964.1
PATE2
BNIP1
CLVS1
RFWD2
MEOX1
PHACTR1
DBNDD2
SERPINE1
IRX2
HIRIP3
HSPD1
EXOSC10
BLACE
MESDC2
VGLL2
DPF3
HLA-DRA
DCAF8L1
LIN28B
TAS2R14
DOK5
C5orf28
GFOD1
CACNG8
C1QL4
DDX4
RDH11
MAF
ENPP1
NRIP2
ZNF37A
SENP8
RASA4
UBE3D
CHD7
BEST4
EXOC6
HNRNPU
EMP2
PCDHB12
MEX3A
IL24
MAP1B
WARS2
MTCP1
HPGDS
ZNF462
CBLB
SPDYE2
TM7SF2
PRCD
HS3ST3A1
DDX21
CDCA7
ZNF788
ZNF141
RHOBTB3
PIGP
AK2
MS4A6A
FSCN3
C5orf54
FAM46A
METTL7B
MYOZ2
ZNF195
SLC10A3
ERC1
PHF21A
SPAST
SWI5
AKAP6
F2RL3
C10orf40
NEUROD1
PHF20
EED
ANKRD1
RNPC3
RPS6KA5
GPATCH11
MURC
ASB11
RGMA
COPS2
POTEM
TNFRSF13B
AC012215.1
ZNF552
BCAR3
GNPTG
IFI44
C8A
POLD3
POTEG
RRP36
HS3ST5
JUND
GSTM2
IGFL3
TACR2
APLN
GJA9
ATF1
BCMO1
C15orf53
WASF3
PAX4
TCP11L2
SMAD2
ZNF704
B3GALNT1
MIS12
BHLHE40
PRRG4
AK3
UQCR10
CD200
SOWAHB
PP13439
TCF7L2
COG7
TSC22D3
BHLHA9
MICALCL
CYHR1
MDM4
PCP4
GNAI3
ZNF99
AL645730.2
TRAPPC3L
GSC2
C3orf79
ATF2
TMEM43
DRGX
RSAD1
CLDN12
PSG1
MAGEB18
GPR158
MID1IP1
EIF4E3
S100PBP
RNF175
GPR31
HTR4
RHOU
RAB31
CD96
ZNF536
MARVELD1
TBL1XR1
MRAP2
ABCA7
ZNRF1
FCGR2B
PUS7
LRRC10B
LL22NC03-63E9.3
EIF3I
PPP1R1A
CCDC173
PRAME
BACE1
PATE4
SPDYE2B
LY6G6D
P2RX3
CBS
NTM
NXT2
TLL1
BARX2
C6orf62
NBPF15
DEFB132
NBPF16
SOX11
YPEL5
COG2
STS
GFPT1
IGFBP3
C12orf23
CCER1
GTF2A2
KDM4E
PLD1
FAM120AOS
TCF3
PLEKHB2
RAD1
COL6A6
TGFA
NEDD1
KCNE3
MAP7D2
NANOS2
CD84
ATXN7
DKFZP667F0711
DCAF4L1
ENDOU
ZSCAN23
TMF1
C19orf69
KRT33A
XCR1
GPR156
LIMS1
SNX11
NR2E1
KRT84
ANKRD34B
ZNF75D
SLC22A13
CDC42EP3
ARPC5L
REEP1
ALKBH4
ZNF24
PRKAB2
TMPRSS11D
RAP2A
COA5
PTPRR
LIN52
COL4A5
TMEM192
CXCL5
POP1
AC004899.1
IGFL2
GALNT2
IMPA1
ZNF705B
ZNF705D
FSBP
CASP7
ZNF208
PRDX3
HES1
EGLN3
FAM179B
RP11-650K20.3
ZNF625
MAGEB4
TMPRSS11A
C7orf41
PI15
CLCN3
MYCT1
ZNF705G
RPL37
SLC7A1
PPIL1
GINS4
MAP3K13
RP11-58C22.1
ZNF107
CHST9
TTC14
LSM1
PLCE1
CD83
SLC39A6
DEPTOR
ATP6V1D
ASB5
ZNF426
VGLL3
SUPT16H
TMEM154
USP14
CSGALNACT2
C10orf85
SMYD3
DRAP1
DRAM1
GJA5
ABCA10
SMARCA2
OR11A1
SLC43A1
IL31RA
SSSCA1
KIAA1429
CCND1
ZNF396
PANK1
AC069547.1
ZBTB18
ALMS1
ITGA10
AC092850.1
ZNF844
HRK
C12orf43
HMBS
NBPF1
MTRNR2L4
TACR3
ATP8A1
NIPAL2
C1ORF220
SMCP
CARD18
FBXL20
KRT4
VPS36
ENTPD3
DEFB134
DRD5
SPIN4
FAM35A
MED7
CNTD1
LCA5
MEGT1
LY6G6F
KCTD18
CTD-2021H9.3
NRAS
KRBOX4
LONRF1
FBLN5
TRIM39
LSM4
ZNF415
DCHS2
XG
AICDA
ZNF823
MYOG
TAF3
FPR3
IKBKG
VBP1
PPP1R10
ST6GALNAC3
LILRA1
UTP18
ZNF140
PSMA4
PDLIM5
EPHA7
RPGR
NYX
LOH12CR2
FAM187A
PPP2R2C
SPATA9
FEN1
GABRB1
ZBTB26
CCDC155
CXorf21
TMEM19
MYOCD
HAUS2
KIRREL
VWC2
CEACAM16
BTG4
PTCHD1
CTD-2370N5.3
FRAT2
PITX2
ZNF136
USP6
SLA
TTC23L
CTU1
ZBTB9
E2F7
RTCA
PSG4
STARD4
CKAP2
CTXN2
NME8
AC069547.2
DUSP16
KCND1
CLSTN2
C10orf53
TRAT1
EPM2A
FUNDC1
OR1C1
STOML1
ZNF648
SLC4A10
HS3ST1
SSR2
ACER2
LEPROT
STAU2
BCL2L13
ARG1
RBPMS
CFHR3
MTMR1
ZNF398
CLIC4
RIC3
WBP1L
DOK6
GPR4
LCE6A
DTX1
CELF5
SLC2A4
STEAP3
ONECUT2
ESYT1
BCAS1
CLDN19
H2AFY2
GALR1
RP11-180C1.1
EBP
SLC5A5
NKIRAS2
TACC1
HIPK2
RAET1E
PLEKHG7
RP11-480I12.4
HSBP1L1
PCNXL4
RNF217
AL391152.1
AC024257.1
SPATA17
SPOP
ENPP5
ALKBH3
FGF9
CBR1
CDADC1
DEFB106B
DEFB106A
MTHFD1
HOXA10
GP1BA
TGDS
C9orf47
EMX2
FCGR2A
UGCG
IL22RA2
LMAN2L
PRELID2
UBE4B
EEA1
CGNL1
C1QTNF7
NBPF11
PSMD7
MAGEL2
SLC41A3
ITK
HMGCS2
MBIP
KCNJ3
AC011294.3
HNRNPA1L2
DLEU1
ZNF791
TANGO6
MOB1B
AFAP1L1
NCKAP5
AHI1
NBPF10
PDCD1
ZNF266
VHL
TRIQK
CCNH
TRMT1L
E4F1
CLEC7A
AC005481.5
PKP2
RPN2
DLEU2L
PPP2R5E
ARL17A
HECW1
GLRA1
DKFZP779L1853
SAA2
USP51
RPL36A-HNRNPH2
BROX
SCLT1
TLX2
AL162407.1
REXO2
ANGPTL4
MSRB3
